# Supplementary material for: Intrafollicular Retinoic Acid Signaling Is Important for Luteinizing Hormone-Induced Oocyte Meiotic Resumption
Source: MDPI journal article supplement (doi:10.3390/genes14040946), 2023-04-20
Supplement: s1 [file s1]

# Intrafollicular Retinoic Acid Signaling Is Important for Luteinizing Hormone-Induced Oocyte Meiotic Resumption

Fupeng Wang <sup>†</sup>, Yawen Tang <sup>†</sup>, Yijie Cai, Ran Yang, Zongyu Wang, Xiaodong Wang, Qianying Yang, Wenjing Wang, Jianhui Tian and Lei An <sup>\*</sup>

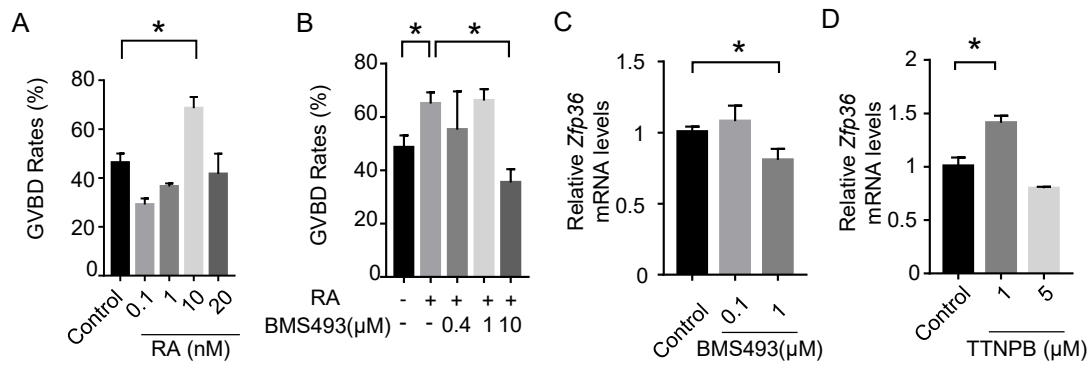

**Figure S1.** Screening experiments of suitable concentration for RA, RAR antagonist (BMS493), RAR agonist (TTNPB) in follicle culture or MGCs culture. (A) The GVBD rates of oocytes collected from preovulatory follicles cultured with different concentration of RA.  $*P < 0.05$ . (B) The GVBD rates of oocytes collected from preovulatory follicles cultured with RA alone or together with different concentration of BMS493.  $*P < 0.05$ . (C) The mRNA expression levels of *Zfp36* in MGCs cultured with different concentration of BMS493.  $*P < 0.05$ . (D) The mRNA expression levels of *Zfp36* in MGCs cultured with different concentration of TTNPB.  $*P < 0.05$ .

**Table S1.** All the primers used in this research.

| Gene                  | Forward primer          | Reverse primer           |
|-----------------------|-------------------------|--------------------------|
| qPCR primers          |                         |                          |
| <i>Gapdh</i>          | CCTGGAGAAACCTGCCAAGTAT  | GGAAGAGTGGGAGTTGCTGTTG   |
| <i>Nppc</i>           | GGTCTGGGATGTTAGTGCAGCTA | TAAAAGCCACATTGCGTTGGA    |
| <i>Zfp36</i>          | CGAGAGCCTCCAGTCGATGAG   | GGATGGAGTCCGAGTTTATGTTCC |
| <i>Egr1</i>           | CCGAGCGAACAACCCTATGA    | TGGGATAACTCGTCTCCACCAT   |
| <i>Elk1</i>           | ATCCCTGCTCCCCACACATAC   | CCACTGGACGGAAACTGGAA     |
| <i>Areg</i>           | GCAGATACATCGAGAACCTGGAG | CCTTGTCATCCTCGCTGTGAGT   |
| <i>Ereg</i>           | TGCTTTGTCTAGGTTCCCACC   | GGCGGTACAGTTATCCTCGG     |
| <i>Btc</i>            | TTCGTGGTGGACGAGCAAATC   | CCATGACCACTATCAAGCAGACC  |
| CUT&RUN qPCR primer   |                         |                          |
| RARA-<br><i>Zfp36</i> | GTCCCGGAAGCTCTAGTGG     | GACTGTCCGTTTCGCAGAAGT    |

**Table S2.** Vitamin A deficient diet ingredients table

| Vitamin A deficient diet      |               |
|-------------------------------|---------------|
| Ingredients                   | Weight (g/kg) |
| V1002 (Vitamins and minerals) | 10            |
| Casein                        | 200           |
| Cystine                       | 3             |
| Starch                        | 397           |
| Maltodextrin                  | 132           |
| Saccharose                    | 100           |
| Cellulose                     | 50            |
| Soya-bean oil                 | 70            |
| TBHQ                          | 0.014         |
| M1003G                        | 35            |
| Choline Bitartrate            | 2.5           |
|                               |               |
| V1002 Ingredients table       |               |
| Ingredients                   | Weight (g/kg) |
| Vitamin A (50%)               | 0             |
| Vitamin D3                    | 0.2           |
| Vitamin E                     | 10.08         |
| Vitamin K                     | 0.078         |
| Biotin                        | 0.1           |
| Vitamin B12                   | 0.25          |
| Folic acid                    | 0.21          |
| Nicotinic acid                | 3             |
| Calcium pantothenate          | 1.6           |
| Vitamin B6                    | 0.7           |
| Vitamin B2                    | 0.75          |
| Vitamin B1                    | 0.6           |
| Sucrose                       | 982.5         |
